# Supplementary material for: A new Co(ii)-metalloviologen-based electrochromic material integrated in thin multilayer films
Source: Royal Society of Chemistry journal article supplement (doi:10.1039/b500994d), 2005-01-01

## Electronic Supplementary Information

*Layer-by-layer Assembly:* ITO-coated glass (on one side, about  $6\ \Omega\text{m}$ ,  $7 \times 50\ \text{mm}^2$ ) substrates were cleaned according to standard procedures. Before assembly, the cleaned ITO-coated glass electrodes were functionalized by immersing the substrates into a toluene solution of 3-aminopropyltrimethoxysilane. The electrodes were coated by alternating adsorption of poly(styrenesulfonate) ( $M_w$  70 000, Aldrich; 0.1 M aqueous solution, 0.1 M NaCl) and CoMEPE (~0.1 mM in a water:ethanol (1:1) mixture, 0.05 M  $\text{NaNO}_3$ ).

*UV/vis spectra:* (PSS–CoMEPE)<sub>40</sub> multilayer film at 0.0 V (dashed line) and at -1.1 V (solid line).

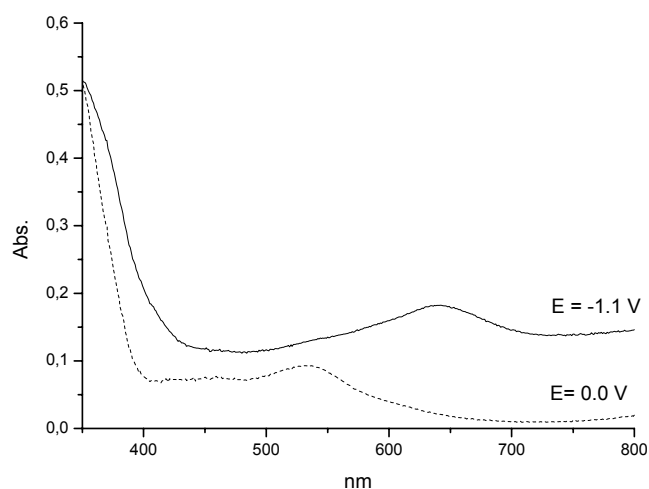

*Cyclic Voltammetry*: Dependence of the peak current on the square root of the scan rate

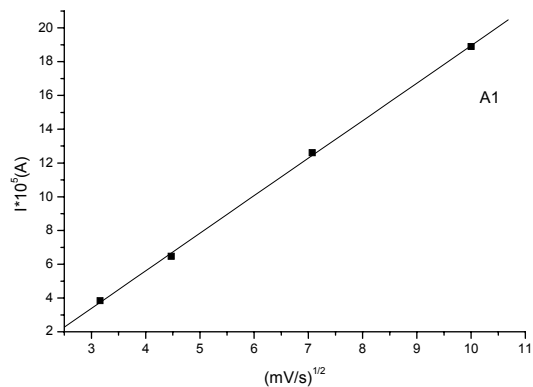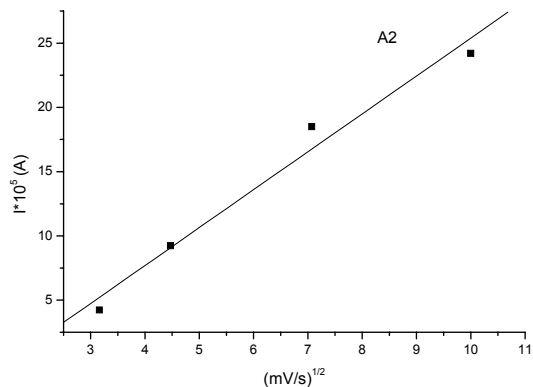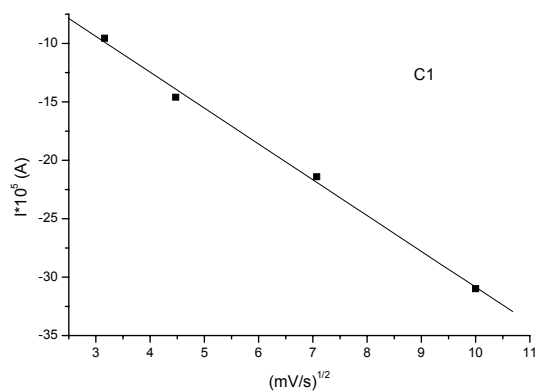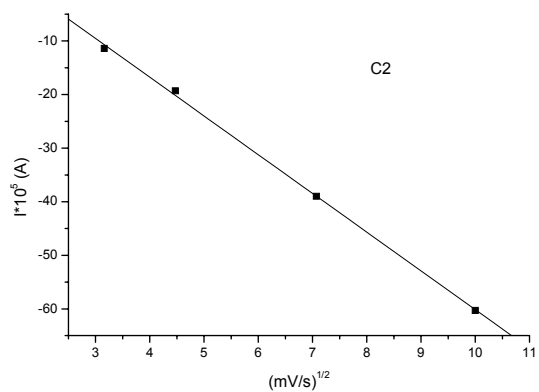

Supplement: b500994d.pdf [file b500994d.pdf]
